# Supplementary material
Source: PubMed Central journal article supplement (PMC8823930)

## **Supplemental Material Table of Contents**

Supplemental Table 1. Definitions for pre-existing cardiovascular comorbid conditions.

Supplemental Table 2. Confounders in the relationship between the determinant of interest and HRQOL, based on literature and expert opinion.

Supplemental Table 3. Proportion of missing values.

Supplemental Table 4. A complete case analysis of the annual decline in HRQOL in men and women.

Supplemental Table 5. Participant characteristics at baseline for excluded and included participants.

Supplemental Table 6. Annual decline for SF36 domain scores in men and women.

Supplemental Table 7. Annual decline in QoL in men and women adjusted for informative censoring due to dropout caused by death or dialysis.

Supplemental Table 8. Annual decline in HRQOL in men and women and subsequent adjustment for (groups of) covariates. The adjusted estimates for (the difference between) the sex-specific slopes for HRQOL can be compared with the estimates from the unadjusted model. The difference between the two estimates then represents the proportion of the effect of sex on HRQOL slope that is explained through the covariates.

Supplemental Table 9. Exploratory univariable sex-specific determinants of mean physical and mental QoL

Supplemental Figure 1. Flow chart.

Supplemental Table 1. Definitions for pre-existing cardiovascular comorbid conditions.

**Cerebrovascular disease;** patients with a history of cerebrovascular accident with minor or no residual symptoms and transient ischemic attacks.

**Peripheral arterial disease;** intermittent claudication or bypass for arterial insufficiency, those with gangrene or acute arterial insufficiency, and those with untreated thoracic or abdominal aneurysm (6 cm or more).

**Myocardial infarction;** ST and non-ST elevation myocardial infarction, includes patients with one or more definite or probable myocardial infarctions, these patients had ECG and/or enzyme changes. Patients with ECG changes alone were not designated as having had a myocardial infarction.

**Angina pectoris;** chronic exertional angina, or coronary artery bypass graft, and those admitted with unstable angina.

**Congestive heart failure;** exertional or paroxysmal nocturnal dyspnea, or responded symptomatically to digitalis, diuretics, or afterload reducing agents. It does not include patients on medication but have had no symptomatic response, and no evidence of improvement of physical signs.

**Left ventricular hypertrophy;** confirmed by echo or ECG.

**Hypertension;** sustained blood pressure of >140/90 or using antihypertensives.

**Cardiac arrhythmias;** includes arrhythmias, patient with chronic atrial fibrillation or flutter, sick sinus syndrome, or ventricular arrhythmias requiring chronic treatment.

**Diabetes;** includes patient with retinopathy, neuropathy, or nephropathy, patients who had previous hospitalizations for ketoacidosis, hyperosmolar coma, or control, and those with juvenile onset, or brittle diabetes, or patients treated with insulin or oral hypoglycemic, but not diet alone.

Supplemental Table 2. Confounders in the relationship between the determinant of interest and HRQOL, based on literature and expert opinion.

| Determinant -->              | eGFR | Hb  | PO4 | Systolic BP | Cholesterol | Diabetes | PVD | MI  |
|------------------------------|------|-----|-----|-------------|-------------|----------|-----|-----|
| <b>Demographics</b>          |      |     |     |             |             |          |     |     |
| Age                          | Yes  | Yes | Yes | Yes         | Yes         | Yes      | Yes | Yes |
| Education level              | Yes  | No  | Yes | Yes         | Yes         | Yes      | Yes | Yes |
| Marital status               | Yes  | No  | Yes | Yes         | Yes         | Yes      | Yes | Yes |
| More than one child          | Yes  | No  | Yes | Yes         | Yes         | Yes      | Yes | Yes |
| Primary kidney disease       | Yes  | No  | No  | Yes         | Yes         |          | Yes | Yes |
| Weight                       | Yes  | No  | No  | Yes         | Yes         | Yes      | Yes | Yes |
| Height                       | Yes  | No  | No  | Yes         | Yes         | Yes      | Yes | Yes |
| BMI                          | Yes  | No  | No  | Yes         | Yes         | Yes      | Yes | Yes |
| <b>Medication</b>            |      |     |     |             |             |          |     |     |
| Hyperpolypharmacy            | Yes  | Yes | Yes | Yes         | Yes         | Yes      | No  | No  |
| Antidepressant prescription  | Yes  | No  | No  | Yes         | No          | Yes      | No  | No  |
| <b>Cardiovascular</b>        |      |     |     |             |             |          |     |     |
| Systolic blood pressure      | Yes  | No  | No  | NA          | No          | No       | Yes | Yes |
| Diastolic blood pressure     | Yes  | No  | No  | Yes         | No          | No       | Yes | Yes |
| Hb                           | No   | NA  | No  | Yes         | No          | No       | No  | Yes |
| Smoking status               | Yes  | Yes | Yes | Yes         | Yes         | Yes      | Yes | Yes |
| <b>Blood chemistry</b>       |      |     |     |             |             |          |     |     |
| Albumin                      | No   | No  | No  | No          | Yes         | No       | No  | No  |
| Calcium                      | Yes  | No  | No  | Yes         | No          | No       | Yes | Yes |
| Cholesterol                  | Yes  | No  | No  | Yes         | NA          | No       | Yes | Yes |
| PO4                          | Yes  | No  | NA  | Yes         | No          | No       | Yes | Yes |
| Potassium                    | Yes  | No  | No  | Yes         | No          | No       | No  | Yes |
| <b>Renal function</b>        |      |     |     |             |             |          |     |     |
| CKDEPI                       | NA   | Yes | Yes | Yes         | No          | No       | Yes | Yes |
| UACR                         | Yes  | Yes | Yes | Yes         | No          | No       | Yes | Yes |
| <b>Comorbidities</b>         |      |     |     |             |             |          |     |     |
| Diabetes                     | Yes  | No  | No  | Yes         | Yes         | NA       | Yes | Yes |
| Chronic heart failure        | Yes  | No  | No  | Yes         | No          | No       | Yes | Yes |
| Cerebrovascular disease      | Yes  | No  | No  | Yes         | No          | No       | Yes | Yes |
| Peripheral vascular disease  | Yes  | No  | No  | Yes         | No          | No       | NA  | Yes |
| Myocardial infarction        | Yes  | No  | No  | Yes         | No          | No       | Yes | NA  |
| Angina pectoris              | Yes  | No  | No  | Yes         | No          | No       | Yes | Yes |
| Left ventricular hypertrophy | Yes  | No  | No  | Yes         | No          | No       | Yes | Yes |
| Atrial fibrillation          | Yes  | No  | No  | Yes         | No          | No       | Yes | Yes |
| Hypertension                 | Yes  | No  | No  | No          | No          | No       | Yes | Yes |

Supplemental Table 3. Proportion of missing values.

|                              | Missing (%) |
|------------------------------|-------------|
| <b>Demographics</b>          |             |
| Age                          | 0           |
| Education level              | 2.7         |
| Marital status               | 3           |
| More than one child          | 0           |
| Primary kidney disease       | 1.3         |
| Weight                       | 3.7         |
| Height                       | 6.4         |
| BMI                          | 6.9         |
| <b>Medication</b>            |             |
| Hyperpolypharmacy            | 0           |
| Antidepressant prescription  | 0           |
| <b>Cardiovascular</b>        |             |
| Systolic blood pressure      | 2.3         |
| Diastolic blood pressure     | 2.3         |
| Hb                           | 2.4         |
| Smoking status               | 2.8         |
| <b>Blood chemistry</b>       |             |
| Albumin                      | 10.5        |
| Calcium                      | 6.8         |
| Cholesterol                  | 24.1        |
| PO4                          | 6.6         |
| Potassium                    | 1.8         |
| <b>Renal function</b>        |             |
| CKDEPI                       | 1.4         |
| UACR                         | 53.1        |
| <b>Comorbidities</b>         |             |
| Diabetes                     | 2.5         |
| Chronic heart failure        | 5.1         |
| Cerebrovascular disease      | 3           |
| Peripheral vascular disease  | 4           |
| Myocardial infarction        | 2.5         |
| Angina pectoris              | 4           |
| Left ventricular hypertrophy | 13.1        |
| Atrial fibrillation          | 3.7         |
| Hypertension                 | 4.7         |
| <b>SF36</b>                  |             |
| Mental health score          | 9.8         |
| Physical health score        | 16.3        |
| Physical functioning         | 1.7         |
| Physical role functioning    | 4.6         |
| Emotional role functioning   | 5.8         |
| Bodily pain                  | 12.4        |
| Social role functioning      | 2.7         |
| Mental health                | 4.1         |
| Vitality                     | 3           |
| General health perceptions   | 2.5         |

Supplemental Table 4. A complete case analysis of the annual decline in HRQOL in men and women.

| Physical Component Summary |                |                  |                |                   |                |
|----------------------------|----------------|------------------|----------------|-------------------|----------------|
| <i>Men</i>                 | <i>p-value</i> | <i>Women</i>     | <i>p-value</i> | <i>Difference</i> | <i>p-value</i> |
| -3.1 (-3.7 - -2.4)         | <.001          | -1.7 (-2.6--0.7) | <.001          | 1.4 (0.3 - 2.6)   | 0.02           |

| Mental Component Summary |                |                    |                |                   |                |
|--------------------------|----------------|--------------------|----------------|-------------------|----------------|
| <i>Men</i>               | <i>p-value</i> | <i>Women</i>       | <i>p-value</i> | <i>Difference</i> | <i>p-value</i> |
| -2.9 (-3.6 - -2.3)       | <.001          | -1.8 (-2.7 - -0.9) | <.001          | 1.1 (0.0 - 2.2)   | 0.05           |

Supplemental Table 5. Participant characteristics at baseline for excluded and included participants.

|                                     | Excluded (n=320) | Included (n=1421) | P-value |
|-------------------------------------|------------------|-------------------|---------|
| <b>Demographics</b>                 |                  |                   |         |
| Age                                 | 77 (6)           | 76 (6)            | 0.45    |
| Sex (% women)                       | 121 (37)         | 486 (34)          | 0.24    |
| Education level (%)                 |                  |                   |         |
| Low education                       | 97 (30)          | 445 (31)          | 0.86    |
| Intermediate education              | 177 (55.3)       | 763 (54)          |         |
| High education                      | 46 (14)          | 214 (15)          |         |
| Marital status (%)                  |                  |                   |         |
| Married                             | 206 (64)         | 915 (64)          | 0.64    |
| Divorced                            | 26 (8)           | 105 (7)           |         |
| Widowed                             | 71 (22)          | 345 (24)          |         |
| Never married                       | 17 (5)           | 57 (4)            |         |
| More than one child (%)             | 286 (89)         | 1260 (88)         | 0.77    |
| Primary kidney disease (%)          |                  |                   |         |
| Glomerular disease                  | 17 (5)           | 142 (10)          | 0.01    |
| Tubulo-interstitial disease         | 20 (6)           | 127 (9)           |         |
| Diabetes                            | 67 (20)          | 290 (20)          |         |
| Hypertension                        | 113 (35)         | 515 (36)          |         |
| Miscellaneous renal disorders       | 103 (32)         | 348 (25)          |         |
| Weight (kg)                         | 79 (18)          | 80 (17)           | 0.53    |
| Height (cm)                         | 166 (10)         | 168 (10)          | 0.003   |
| BMI (kg/m <sup>2</sup> )            | 29 (5)           | 28 (5)            | 0.54    |
| <b>Medication</b>                   |                  |                   |         |
| Hyperpolypharmacy (%)               | 110 (34)         | 333 (23)          | <0.001  |
| Antidepressant prescription (%)     | 27 (8)           | 97 (7)            | 0.37    |
| <b>Cardiovascular</b>               |                  |                   |         |
| Systolic blood pressure (mmHg)      | 142 (23)         | 143 (22)          | 0.51    |
| Diastolic blood pressure            | 73.03 (12)       | 73.99 (11)        | 0.17    |
| Hb (g/dL)                           | 7.3 (1.0)        | 7.2 (0.9)         | 0.20    |
| Smoking status (%)                  |                  |                   | 0.53    |
| Current smoker                      | 32 (10)          | 125 (9)           |         |
| Ex-smoker                           | 162 (51)         | 767 (53)          |         |
| Never                               | 126 (39)         | 530 (37)          |         |
| <b>Blood chemistry</b>              |                  |                   |         |
| Albumin (g/dL)                      | 3.8 (6.2)        | 3.8 (5.7)         | 0.69    |
| Calcium (mmol/L)                    | 9.2 (0.8)        | 9.2 (0.8)         | 0.06    |
| Cholesterol (mmol/L)                | 174 (50)         | 174 (50)          | 0.28    |
| PO <sub>4</sub> (mmol/L)            | 4.0 (0.9)        | 4.0 (0.9)         | 0.26    |
| Potassium (mEq/L)                   | 4.7 (0.7)        | 4.6 (0.6)         | 0.03    |
| <b>Renal function</b>               |                  |                   |         |
| CKDEPI (ml/min/1.73m <sup>2</sup> ) | 18 (6)           | 17 (5)            | 0.18    |
| UACR                                | 24 [3, 141]      | 31 [5, 131]       | 0.53    |
| <b>Comorbidities</b>                |                  |                   |         |
| Diabetes (%)                        | 147 (45)         | 589 (41)          | 0.16    |
| Chronic heart failure (%)           | 52 (16)          | 263 (19)          | 0.39    |
| Cerebrovascular disease (%)         | 55 (17)          | 213 (15)          | 0.37    |
| Peripheral vascular disease (%)     | 56 (18)          | 240 (17)          | 0.85    |
| Myocardial infarction (%)           | 48 (15)          | 249 (18)          | 0.32    |
| Angina pectoris (%)                 | 41 (13)          | 217 (15)          | 0.31    |
| Left ventricular hypertrophy (%)    | 69 (22)          | 342 (24)          | 0.38    |
| Atrial fibrillation (%)             | 70 (22)          | 255 (18)          | 0.12    |
| Hypertension (%)                    | 282 (88)         | 1267 (89)         | 0.69    |

Supplemental Table 6. Annual decline for SF36 domain scores in men and women.

| Domain                        | Men                | P-value | Women              | P-value | Difference        | P-value |
|-------------------------------|--------------------|---------|--------------------|---------|-------------------|---------|
| <i>Mental summary score</i>   |                    |         |                    |         |                   |         |
| Mental health                 | -1.8 (-2.3 - -1.2) | <.001   | -0.9 (-1.7 - -0.2) | 0.01    | 0.8 (-0.1 - 1.8)  | 0.08    |
| Role functioning emotional    | -3.7 (-5.1 - -2.3) | <.001   | -1.4 (-3.3 - 0.5)  | 0.15    | 2.3 (-0.1 - 4.6)  | 0.06    |
| Social functioning            | -3.3 (-4.1 - -2.4) | <.001   | -3.0 (-4.2 - -1.8) | <.001   | 0.3 (-1.2 - 1.7)  | 0.72    |
| Vitality                      | -2.0 (-2.6 - -1.3) | <.001   | -1.8 (-2.7 - -0.9) | <.001   | 0.2 (-0.9 - 1.3)  | 0.70    |
| <i>Physical summary score</i> |                    |         |                    |         |                   |         |
| Physical functioning          | -3.2 (-4.0 - -2.3) | <.001   | -2.1 (-3.2 - -1.0) | <.001   | 1.1 (-0.4 - 2.5)  | 0.14    |
| Bodily pain                   | -2.6 (-3.5 - -1.8) | <.001   | -0.4 (-1.5 - 0.8)  | 0.52    | 2.3 (0.8 - 3.7)   | <.001   |
| Role functioning physical     | -3.8 (-5.3 - -2.3) | <.001   | -1.3 (-3.4 - 0.7)  | 0.21    | 2.4 (-0.1 - 5.0)  | 0.06    |
| General health                | -0.6 (-1.2 - 0.1)  | 0.07    | -1.0 (-1.9 - -0.1) | 0.03    | -0.4 (-1.5 - 0.7) | 0.46    |

Supplemental Table 7. Annual decline in QoL in men and women adjusted for informative censoring due to dropout caused by death or dialysis.

|                                                                | <b>Men</b>         | <b>Women</b>       |
|----------------------------------------------------------------|--------------------|--------------------|
| PCS: Unadjusted linear mixed model                             | -2.5 (-3.1 - -1.8) | -1.1 (-2.0 - -0.1) |
| PCS: Joint model adjusting for dropout due to death & dialysis | -2.6 (-9.2 - 3.9)  | -0.9 (-8.4 - 6.6)  |
| MCS: Unadjusted linear mixed model                             | -2.7 (-3.4 - -2.0) | -1.6 (-2.6 - -0.7) |
| MCS: Joint model adjusting for dropout due to death & dialysis | -3.6 (-10.7 - 3.1) | -1.7 (-11.2 - 8.1) |



Supplemental Table 8. Annual decline in HRQOL in men and women and subsequent adjustment for (groups of) covariates. The adjusted estimates for (the difference between) the sex-specific slopes for HRQOL can be compared with the estimates from the unadjusted model. The difference between the two estimates then represents the proportion of the effect of sex on HRQOL slope that is explained through the covariates.

|                             | Physical Component Summary |                           |                         |             | Mental Component Summary  |                           |                         |             |
|-----------------------------|----------------------------|---------------------------|-------------------------|-------------|---------------------------|---------------------------|-------------------------|-------------|
|                             | Women                      | Men                       | Difference              | p-value     | Women                     | Men                       | Difference              | p-value     |
| <b>Unadjusted model</b>     | <b>-1.1 (-2.0 - -0.1)</b>  | <b>-2.5 (-3.1 - -1.8)</b> | <b>1.4 ( 0.3 - 2.5)</b> | <b>0.01</b> | <b>-1.6 (-2.6 - -0.7)</b> | <b>-2.7 (-3.4 - -2.0)</b> | <b>1.1 (-0.1 - 2.2)</b> | <b>0.07</b> |
| <b>Demographics</b>         |                            |                           |                         |             |                           |                           |                         |             |
| Age                         | -1.1 (-2.0 - -0.2)         | -2.5 (-3.1 - -1.8)        | 1.4 ( 0.3 - 2.5)        | 0.01        | -1.6 (-2.6 - -0.7)        | -2.7 (-3.4 - -2.1)        | 1.1 (-0.1 - 2.2)        | 0.06        |
| Education level             | -1.1 (-2.1 - -0.2)         | -2.5 (-3.2 - -1.8)        | 1.4 ( 0.2 - 2.5)        | 0.02        | -1.4 (-2.4 - -0.4)        | -2.5 (-3.3 - -1.8)        | 1.1 (-0.1 - 2.3)        | 0.06        |
| Marital status              | -0.5 (-1.6 - 0.6)          | -1.9 (-2.9 - -0.8)        | 1.4 ( 0.2 - 2.6)        | 0.02        | -1.1 (-2.2 - 0.0)         | -2.0 (-3.1 - -1.0)        | 1.0 (-0.3 - 2.2)        | 0.12        |
| One or more children        | -1.3 (-2.4 - -0.1)         | -2.7 (-3.6 - -1.8)        | 1.4 ( 0.3 - 2.5)        | 0.01        | -1.8 (-3.0 - -0.7)        | -2.9 (-3.8 - -2.0)        | 1.1 (-0.1 - 2.2)        | 0.07        |
| Primary kidney disease      | -1.0 (-1.9 - 0.0)          | -2.3 (-3.0 - -1.6)        | 1.3 ( 0.2 - 2.5)        | 0.02        | -1.4 (-2.4 - -0.5)        | -2.4 (-3.2 - -1.7)        | 1.0 (-0.1 - 2.2)        | 0.09        |
| Country                     | -1.1 (-2.0 - -0.2)         | -2.5 (-3.2 - -1.8)        | 1.4 ( 0.3 - 2.6)        | 0.01        | -1.7 (-2.6 - -0.8)        | -2.8 (-3.4 - -2.1)        | 1.1 (-0.1 - 2.2)        | 0.07        |
| <i>All demographics</i>     | -1.0 (-2.2 - 0.3)          | -2.2 (-3.3 - -1.0)        | 1.2 ( 0.0 - 2.4)        | 0.06        | -1.1 (-2.4 - 0.2)         | -2.0 (-3.1 - -0.8)        | 0.8 (-0.4 - 2.1)        | 0.19        |
| <b>Medication</b>           |                            |                           |                         |             |                           |                           |                         |             |
| Hyperpolypharmacy           | -0.8 (-1.8 - 0.2)          | -2.2 (-3.0 - -1.4)        | 1.4 ( 0.3 - 2.5)        | 0.02        | -1.6 (-2.6 - -0.6)        | -2.7 (-3.5 - -1.9)        | 1.1 (-0.1 - 2.2)        | 0.07        |
| Antidepressant prescription | -0.6 (-1.9 - 0.7)          | -2.0 (-3.2 - -0.7)        | 1.4 ( 0.2 - 2.5)        | 0.02        | -1.0 (-2.3 - 0.4)         | -1.9 (-3.3 - -0.6)        | 1.0 (-0.2 - 2.1)        | 0.10        |
| <i>All medication</i>       | -0.5 (-1.8 - 0.8)          | -1.9 (-3.1 - -0.6)        | 1.4 ( 0.2 - 2.5)        | 0.02        | -0.9 (-2.3 - 0.4)         | -1.9 (-3.2 - -0.6)        | 1.0 (-0.2 - 2.1)        | 0.10        |
| <b>Cardiovascular</b>       |                            |                           |                         |             |                           |                           |                         |             |
| Systolic blood pressure     | -1.4 (-2.3 - -0.4)         | -2.7 (-3.4 - -2.0)        | 1.4 ( 0.2 - 2.5)        | 0.02        | -1.8 (-2.8 - -0.8)        | -2.8 (-3.5 - -2.1)        | 1.0 (-0.1 - 2.2)        | 0.08        |
| Diastolic blood pressure    | -1.2 (-2.2 - -0.2)         | -2.6 (-3.3 - -1.9)        | 1.4 ( 0.3 - 2.5)        | 0.02        | -1.5 (-2.5 - -0.5)        | -2.6 (-3.3 - -1.8)        | 1.1 (-0.1 - 2.2)        | 0.07        |
| Hb                          | -1.1 (-2.0 - -0.2)         | -2.3 (-3.0 - -1.7)        | 1.3 ( 0.2 - 2.4)        | 0.03        | -1.7 (-2.6 - -0.8)        | -2.5 (-3.2 - -1.9)        | 0.8 (-0.3 - 2.0)        | 0.14        |
| Smoking status              | -1.2 (-2.3 - -0.1)         | -3.0 (-3.9 - -2.1)        | 1.8 ( 0.6 - 3.0)        | 0.00        | -1.4 (-2.5 - -0.3)        | -2.8 (-3.8 - -1.9)        | 1.4 ( 0.2 - 2.6)        | 0.02        |
| BMI                         | -1.1 (-2.0 - -0.1)         | -2.5 (-3.1 - -1.8)        | 1.4 ( 0.3 - 2.6)        | 0.01        | -1.7 (-2.6 - -0.7)        | -2.7 (-3.4 - -2.0)        | 1.0 (-0.1 - 2.2)        | 0.08        |
| <i>All cardiovascular</i>   | -1.5 (-2.7 - -0.4)         | -3.1 (-4.0 - -2.1)        | 1.5 ( 0.3 - 2.7)        | 0.01        | -1.4 (-2.6 - -0.2)        | -2.4 (-3.4 - -1.4)        | 1.0 (-0.2 - 2.2)        | 0.09        |
| <b>Blood chemistry</b>      |                            |                           |                         |             |                           |                           |                         |             |
| Albumin                     | -1.0 (-1.9 - -0.1)         | -2.4 (-3.0 - -1.7)        | 1.4 ( 0.2 - 2.5)        | 0.02        | -1.6 (-2.5 - -0.7)        | -2.6 (-3.3 - -2.0)        | 1.0 (-0.1 - 2.2)        | 0.08        |
| Calcium                     | -1.1 (-2.0 - -0.2)         | -2.5 (-3.1 - -1.8)        | 1.4 ( 0.3 - 2.5)        | 0.02        | -1.5 (-2.4 - -0.6)        | -2.7 (-3.4 - -2.0)        | 1.2 ( 0.1 - 2.4)        | 0.04        |
| Cholesterol*                | -1.2 (-2.2 - -0.3)         | -2.7 (-3.4 - -2.0)        | 1.5 ( 0.4 - 2.6)        | 0.01        | -2.0 (-2.9 - -1.0)        | -2.9 (-3.7 - -2.2)        | 1.0 (-0.2 - 2.1)        | 0.11        |
| PO4                         | -1.1 (-1.9 - -0.2)         | -2.4 (-3.1 - -1.7)        | 1.4 ( 0.2 - 2.5)        | 0.02        | -1.6 (-2.5 - -0.7)        | -2.5 (-3.2 - -1.9)        | 1.0 (-0.2 - 2.1)        | 0.10        |
| Potassium                   | -1.1 (-2.0 - -0.2)         | -2.4 (-3.1 - -1.8)        | 1.3 ( 0.2 - 2.5)        | 0.02        | -1.7 (-2.6 - -0.8)        | -2.7 (-3.4 - -2.0)        | 1.0 (-0.1 - 2.2)        | 0.08        |
| <i>All blood chemistry</i>  | -1.3 (-2.2 - -0.3)         | -2.6 (-3.3 - -1.8)        | 1.3 ( 0.2 - 2.4)        | 0.02        | -1.8 (-2.8 - -0.8)        | -2.7 (-3.5 - -2.0)        | 0.9 (-0.3 - 2.1)        | 0.13        |

|                              |                    |                    |                  |      |                    |                    |                  |      |  |
|------------------------------|--------------------|--------------------|------------------|------|--------------------|--------------------|------------------|------|--|
| <b>Renal function</b>        |                    |                    |                  |      |                    |                    |                  |      |  |
| CKDEPI*                      | -0.8 (-1.7 - 0.1)  | -1.8 (-2.5 - -1.0) | 0.9 (-0.2 - 2.0) | 0.09 | -1.2 (-2.2 - -0.3) | -1.9 (-2.7 - -1.1) | 0.7 (-0.5 - 1.8) | 0.25 |  |
| UACR                         | -1.4 (-2.3 - -0.4) | -2.7 (-3.4 - -2.0) | 1.3 (0.2 - 2.5)  | 0.02 | -2.2 (-3.2 - -1.2) | -3.1 (-3.9 - -2.4) | 1.0 (-0.2 - 2.1) | 0.10 |  |
| <i>All renal function</i>    | -1.1 (-2.1 - -0.1) | -2.0 (-2.8 - -1.2) | 0.9 (-0.2 - 2.0) | 0.11 | -1.7 (-2.7 - -0.6) | -2.3 (-3.1 - -1.5) | 0.6 (-0.5 - 1.8) | 0.30 |  |
| <b>Comorbidities</b>         |                    |                    |                  |      |                    |                    |                  |      |  |
| Diabetes                     | -0.9 (-1.8 - 0.0)  | -2.2 (-2.9 - -1.6) | 1.3 (0.2 - 2.4)  | 0.02 | -1.6 (-2.5 - -0.7) | -2.7 (-3.4 - -2.0) | 1.1 (-0.1 - 2.2) | 0.06 |  |
| Chronic heart failure        | -0.7 (-1.7 - 0.3)  | -2.1 (-2.9 - -1.3) | 1.4 (0.3 - 2.6)  | 0.01 | -1.7 (-2.8 - -0.7) | -2.8 (-3.6 - -2.0) | 1.1 (-0.1 - 2.2) | 0.06 |  |
| Cerebrovascular disease      | -1.2 (-2.3 - -0.2) | -2.6 (-3.5 - -1.8) | 1.4 (0.3 - 2.5)  | 0.01 | -1.8 (-2.9 - -0.7) | -2.9 (-3.8 - -2.0) | 1.1 (-0.1 - 2.2) | 0.07 |  |
| Peripheral vascular disease  | -0.4 (-1.5 - 0.7)  | -1.9 (-2.7 - -1.1) | 1.5 (0.4 - 2.6)  | 0.01 | -1.4 (-2.5 - -0.3) | -2.5 (-3.3 - -1.6) | 1.1 (0.0 - 2.3)  | 0.06 |  |
| Myocardial infarction        | -1.1 (-2.2 - -0.1) | -2.5 (-3.3 - -1.7) | 1.4 (0.3 - 2.5)  | 0.01 | -1.8 (-2.8 - -0.7) | -2.8 (-3.7 - -2.0) | 1.1 (-0.1 - 2.2) | 0.07 |  |
| Angina pectoris              | -1.6 (-2.6 - -0.5) | -3.0 (-3.8 - -2.1) | 1.4 (0.3 - 2.5)  | 0.01 | -2.1 (-3.2 - -1.0) | -3.2 (-4.0 - -2.3) | 1.1 (-0.1 - 2.2) | 0.07 |  |
| Left ventricular hypertrophy | -1.2 (-2.2 - -0.2) | -2.6 (-3.3 - -1.8) | 1.4 (0.3 - 2.5)  | 0.02 | -1.8 (-2.9 - -0.8) | -2.9 (-3.6 - -2.1) | 1.0 (-0.1 - 2.2) | 0.08 |  |
| Atrial fibrillation          | -1.0 (-2.0 - 0.1)  | -2.4 (-3.2 - -1.6) | 1.4 (0.3 - 2.6)  | 0.01 | -1.7 (-2.7 - -0.7) | -2.8 (-3.6 - -1.9) | 1.1 (-0.1 - 2.2) | 0.07 |  |
| Hypertension                 | -0.9 (-2.0 - 0.3)  | -2.3 (-3.2 - -1.3) | 1.4 (0.3 - 2.5)  | 0.01 | -1.6 (-2.7 - -0.4) | -2.6 (-3.6 - -1.6) | 1.1 (-0.1 - 2.2) | 0.07 |  |
| <i>All comorbidities</i>     | -1.0 (-2.5 - 0.6)  | -2.3 (-3.7 - -0.9) | 1.3 (0.2 - 2.4)  | 0.02 | -2.1 (-3.8 - -0.5) | -3.2 (-4.7 - -1.7) | 1.1 (-0.1 - 2.3) | 0.06 |  |
| <b>Covariate groups</b>      |                    |                    |                  |      |                    |                    |                  |      |  |
| Demographics                 | -1.0 (-2.2 - 0.3)  | -2.2 (-3.3 - -1.0) | 1.2 (0.0 - 2.4)  | 0.06 | -1.1 (-2.4 - 0.2)  | -2.0 (-3.1 - -0.8) | 0.8 (-0.4 - 2.1) | 0.19 |  |
| Medication                   | -0.5 (-1.8 - 0.8)  | -1.9 (-3.1 - -0.6) | 1.4 (0.2 - 2.5)  | 0.02 | -0.9 (-2.3 - 0.4)  | -1.9 (-3.2 - -0.6) | 1.0 (-0.2 - 2.1) | 0.10 |  |
| Cardiovascular               | -1.5 (-2.7 - -0.4) | -3.1 (-4.0 - -2.1) | 1.5 (0.3 - 2.7)  | 0.01 | -1.4 (-2.6 - -0.2) | -2.4 (-3.4 - -1.4) | 1.0 (-0.2 - 2.2) | 0.09 |  |
| Blood chemistry              | -1.3 (-2.2 - -0.3) | -2.6 (-3.3 - -1.8) | 1.3 (0.2 - 2.4)  | 0.02 | -1.8 (-2.8 - -0.8) | -2.7 (-3.5 - -2.0) | 0.9 (-0.3 - 2.1) | 0.13 |  |
| Renal function               | -1.1 (-2.1 - -0.1) | -2.0 (-2.8 - -1.2) | 0.9 (-0.2 - 2.0) | 0.11 | -1.7 (-2.7 - -0.6) | -2.3 (-3.1 - -1.5) | 0.6 (-0.5 - 1.8) | 0.30 |  |
| Comorbidities                | -1.0 (-2.5 - 0.6)  | -2.3 (-3.7 - -0.9) | 1.3 (0.2 - 2.4)  | 0.02 | -2.1 (-3.8 - -0.5) | -3.2 (-4.7 - -1.7) | 1.1 (-0.1 - 2.3) | 0.06 |  |

\*Included as spline effect due to non-linear relationship with HRQOL

Supplemental Table 9. Exploratory univariable sex-specific determinants of mean physical and mental QoL

|                                        | Physical component summary |                       |             | Mental component summary |                       |             |
|----------------------------------------|----------------------------|-----------------------|-------------|--------------------------|-----------------------|-------------|
|                                        |                            |                       | p-value for |                          |                       | p-value for |
|                                        | Female                     | Male                  | interaction | Female                   | Male                  | interaction |
| <b>Demographics</b>                    | -0.6 ( -0.8 - -0.4 )       | -0.5 ( -0.7 - -0.3 )  | 0.44        | -0.4 ( -0.7 - -0.2 )     | -0.2 ( -0.4 - -0.1 )  | 0.23        |
| Age (per year)                         |                            |                       |             |                          |                       |             |
| Education level                        |                            |                       |             |                          |                       |             |
| Low education                          | Ref                        | Ref                   | 0.97        | Ref                      | Ref                   | 0.54        |
| Intermediate education                 | 3.3 ( -0.5 - 7.2 )         | 3.1 ( 0.0 - 6.2 )     |             | 4.9 ( 0.9 - 8.9 )        | 2.3 ( -0.9 - 5.6 )    |             |
| High education                         | 4.3 ( -2.3 - 10.9 )        | 4.8 ( 0.8 - 8.8 )     |             | 6.2 ( -0.7 - 13.1 )      | 4.2 ( 0.1 - 8.4 )     |             |
| Marital status                         |                            |                       |             |                          |                       |             |
| Married                                | Ref                        | Ref                   | 0.48        | Ref                      | Ref                   | 0.22        |
| Divorced                               | -1.7 ( -8.1 - 4.8 )        | -5.4 ( -11.3 - 0.5 )  |             | -0.9 ( -7.7 - 5.8 )      | -7.7 ( -13.8 - -1.6 ) |             |
| Widowed                                | -3.5 ( -7.7 - 0.6 )        | -2.8 ( -6.8 - 1.2 )   |             | -2.3 ( -6.6 - 2.0 )      | -1.0 ( -5.2 - 3.1 )   |             |
| Never married                          | 0.5 ( -8.3 - 9.4 )         | 5.7 ( -2.0 - 13.4 )   |             | 1.7 ( -7.5 - 10.9 )      | 5.3 ( -2.7 - 13.4 )   |             |
| One or more children                   | 2.0 ( -2.6 - 6.7 )         | 3.4 ( 0.0 - 6.8 )     |             | 4.3 ( -0.6 - 9.2 )       | 4.7 ( 1.21 - 8.3 )    | 0.88        |
| Primary kidney disease                 |                            |                       |             |                          |                       |             |
| Glomerular disease                     | Ref                        | Ref                   | 0.14        | Ref                      | Ref                   | 0.48        |
| Tubulo-interstitial disease            | 3.8 ( -5.6 - 13.2 )        | -1.0 ( -7.7 - 5.6 )   |             | -1.6 ( -11.4 - 8.2 )     | -0.1 ( -7.1 - 6.8 )   |             |
| Diabetes                               | -0.6 ( -9.4 - 8.2 )        | -9.6 ( -14.8 - -4.5 ) |             | -4.5 ( -13.6 - 4.7 )     | -7.4 ( -12.9 - -2.0 ) |             |
| Hypertension                           | -1.9 ( -9.9 - 6.0 )        | -4.6 ( -9.4 - 0.3 )   |             | -4.5 ( -12.8 - 3.8 )     | -2.3 ( -7.4 - 2.8 )   |             |
| Miscellaneous renal disorders          | -0.3 ( -8.5 - 8.0 )        | -5.7 ( -10.9 - -0.5 ) |             | -5.6 ( -14.3 - 3.0 )     | -3.4 ( -8.9 - 2.0 )   |             |
| <b>Medication</b>                      |                            |                       |             |                          |                       |             |
| Hyperpolypharmacy                      | -3.4 ( -5.8 - -0.9 )       | -3.1 ( -4.8 - -1.3 )  | 0.85        | -3.2 ( -5.8 - -0.6 )     | -3.3 ( -5.2 - -1.4 )  | 0.96        |
| Antidepressant prescription            | -3.7 ( -7.4 - -0.1 )       | -1.4 ( -5.5 - 2.7 )   | 0.40        | -4.6 ( -8.5 - -0.8 )     | -2.1 ( -6.45 - 2.3 )  | 0.39        |
| <b>Cardiovascular</b>                  |                            |                       |             |                          |                       |             |
| BMI (per kg/m <sup>2</sup> )           | -0.3 ( -0.4 - -0.2 )       | -0.3 ( -0.4 - -0.2 )  | 0.88        | -0.1 ( -0.3 - 0.0 )      | -0.1 ( -0.2 - 0.0 )   | 0.77        |
| Systolic blood pressure (per 10 mmHg)  | -0.2 ( -0.6 - 0.2 )        | 0.4 ( 0.1 - 0.7 )     | 0.02        | 0.0 ( -0.4 - 0.5 )       | 0.4 ( 0.0 - 0.7 )     | 0.21        |
| Diastolic blood pressure (per 10 mmHg) | 0.3 ( -0.4 - 1.1 )         | 0.6 ( 0.1 - 1.2 )     | 0.52        | 0.3 ( -0.5 - 1.1 )       | 0.6 ( 0.1 - 1.2 )     | 0.54        |
| Hb (per g/dL)                          | 0.7 ( 0.1 - 1.4 )          | 1.5 ( 1.1 - 1.9 )     | 0.05        | 0.9 ( 0.3 - 1.6 )        | 1.9 ( 1.4 - 2.3 )     | 0.02        |
| Smoking status                         |                            |                       |             |                          |                       |             |
| Current smoker                         | Ref                        | Ref                   |             | Ref                      | Ref                   |             |
| Ex-smoker                              | 0.2 ( -7.2 - 7.5 )         | 0.0 ( -4.8 - 4.7 )    | 0.53        | 3.9 ( -3.7 - 11.6 )      | -0.3 ( -5.2 - 4.7 )   | 0.36        |
| Never                                  | 0.5 ( -6.6 - 7.6 )         | 2.72 ( -2.4 - 7.8 )   | 0.53        | 2.0 ( -5.4 - 9.4 )       | 0.6 ( -4.7 - 5.9 )    | 0.36        |

|                                                   |                       |                       |       |                       |                       |       |
|---------------------------------------------------|-----------------------|-----------------------|-------|-----------------------|-----------------------|-------|
| <b>Blood chemistry</b>                            |                       |                       |       |                       |                       |       |
| Albumin (per g/dL)                                | 0.4 ( 0.2 - 0.5 )     | 0.4 ( 0.3 - 0.5 )     | 0.58  | 0.3 ( 0.0 - 0.4 )     | 0.4 ( 0.2 - 0.5 )     | 0.33  |
| Calcium (mg/dL)                                   | -0.3 ( -1.5 - 1.0 )   | 0.3 ( -0.7 - 1.3 )    | 0.47  | 1.6 ( 0.2 - 2.9 )     | 1.6 ( 0.5 - 2.6 )     | 0.97  |
| Cholesterol (per 25 mg/dL) at 100 mg/dL           | 1.3 ( 0.1 - 2.4 )     | 1.2 ( 0.5 - 1.9 )     | 0.86  | 1.7 ( 0.4 - 2.9 )     | 1.4 ( 0.6 - 2.2 )     | 0.73  |
| Cholesterol (per 25 mg/dL) at 200 mg/dL           | 0.1 ( -0.3 - 0.5 )    | 0.4 ( 0.1 - 0.8 )     | 0.16  | 1.5 ( 0.3 - 2.7 )     | 1.2 ( 0.4 - 2.0 )     | 0.71  |
| PO4 (per mmol/L)                                  | 0.8 ( -0.1 - 1.6 )    | -1.5 ( -2.1 - -0.9 )  | <.001 | 0.2 ( -0.7 - 1.2 )    | -2.0 ( -2.6 - -1.4 )  | <.001 |
| Potassium (mEq/L)                                 | 1.0 ( -0.5 - 2.4 )    | 0.8 ( -0.3 - 1.8 )    | 0.83  | 1.3 ( -0.3 - 2.8 )    | 0.8 ( -0.3 - 1.9 )    | 0.63  |
| <b>Renal function</b>                             |                       |                       |       |                       |                       |       |
| CKDEPI (per 5 ml/min/1.73m2) at 10 ml/min/1.73m2  | 0.4 ( -2.0 - 2.9 )    | 4.7 ( 3.2 - 6.2 )     | <.001 | 2.9 ( 0.3 - 5.5 )     | 5.6 ( 4.0 - 7.2 )     | 0.09  |
| CKDEPI (per 5 ml/min/1.73m2) at 20 ml/min/1.73m2  | 0.8 ( -0.4 - 2.0 )    | -0.2 ( -1.1 - 0.8 )   | 0.23  | 0.7 ( -0.6 - 2.0 )    | -0.1 ( -1.1 - 0.9 )   | 0.31  |
| UACR (per log ACR)                                | -0.2 ( -0.6 - 0.2 )   | -0.1 ( -0.3 - 0.2 )   | 0.51  | -0.5 ( -0.9 - -0.1 )  | -0.2 ( -0.5 - 0.1 )   | 0.22  |
| <b>Comorbidities</b>                              |                       |                       |       |                       |                       |       |
| Diabetes (present vs. absent)                     | -4.2 ( -7.5 - -0.9 )  | -7.6 ( -10.0 - -5.3 ) | 0.10  | -1.7 ( -5.1 - 1.8 )   | -6.8 ( -9.1 - -4.4 )  | 0.02  |
| Chronic heart failure (present vs. absent)        | -7.2 ( -11.1 - -3.2 ) | -7.2 ( -10.0 - -4.5 ) | 0.98  | -5.3 ( -9.5 - -1.1 )  | -5.6 ( -8.5 - -2.7 )  | 0.91  |
| Cerebrovascular disease (present vs. absent)      | -5.9 ( -10.4 - -1.3 ) | -4.8 ( -8.0 - -1.6 )  | 0.71  | -2.4 ( -7.2 - 2.4 )   | -2.0 ( -5.4 - 1.4 )   | 0.91  |
| Peripheral vascular disease (present vs. absent)  | -4.2 ( -8.8 - 0.5 )   | -6.5 ( -9.4 - -3.6 )  | 0.40  | -2.0 ( -6.9 - 2.8 )   | -7.7 ( -10.7 - -4.6 ) | 0.05  |
| Myocardial infarction (present vs. absent)        | -9.3 ( -14.3 - -4.4 ) | -4.1 ( -7.0 - -1.2 )  | 0.07  | -6.9 ( -12.1 - -1.8 ) | -3.9 ( -6.9 - -0.9 )  | 0.32  |
| Angina pectoris (present vs. absent)              | -8.0 ( -12.9 - -3.0 ) | -7.1 ( -10.0 - -4.2 ) | 0.76  | -5.9 ( -11.1 - -0.7 ) | -5.9 ( -8.9 - -2.8 )  | 0.98  |
| Left ventricular hypertrophy (present vs. absent) | -1.6 ( -4.8 - 1.6 )   | -3.3 ( -5.5 - -1.1 )  | 0.40  | -1.7 ( -5.1 - 1.7 )   | -4.8 ( -7.1 - -2.4 )  | 0.14  |
| Atrial fibrillation (present vs. absent)          | -5.9 ( -9.9 - -1.8 )  | -6.2 ( -9.1 - -3.2 )  | 0.90  | -1.7 ( -5.9 - 2.5 )   | -3.7 ( -6.8 - -0.6 )  | 0.44  |
| Hypertension (present vs. absent)                 | 1.8 ( -3.2 - 6.7 )    | 1.8 ( -1.9 - 5.6 )    | 0.99  | 0.3 ( -4.9 - 5.4 )    | 0.8 ( -3.1 - 4.7 )    | 0.87  |

Supplemental Figure 1. Flow chart.

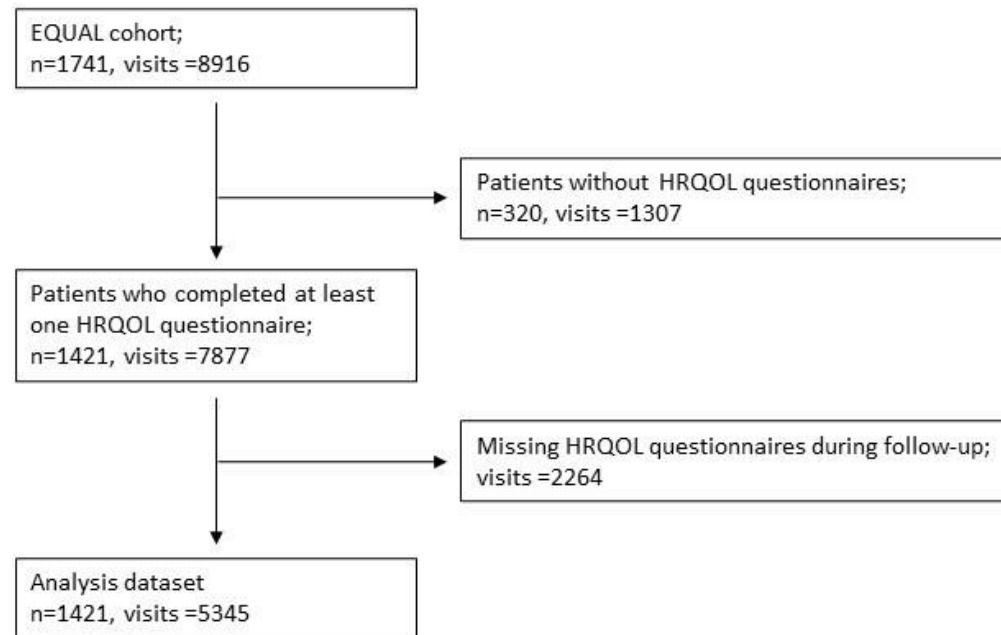

Supplement: CJN.08730621SupplementaryData2.pdf [file CJN.08730621SupplementaryData2.pdf]
